# Supplementary material for: The Draft Genome of the “Golden Tide” Seaweed, Sargassum horneri: Characterization and Comparative Analysis
Source: MDPI journal article supplement (doi:10.3390/genes14101969), 2023-10-21
Supplement: s1 [file s1]

Supplementary Table S1. Gene count of *S.horneri* mapped onto KEGG pathways.

| Metabolic pathway       | Pathway ID | Description of pathway                      | Gene count |
|-------------------------|------------|---------------------------------------------|------------|
| Carbohydrate metabolism | KO00010    | Glycolysis / Gluconeogenesis                | 32         |
|                         | KO00020    | Citrate cycle (TCA cycle)                   | 21         |
|                         | KO00030    | Pentose phosphate pathway                   | 18         |
|                         | KO00040    | Pentose and glucuronate interconversions    | 12         |
|                         | KO00051    | Fructose and mannose metabolism             | 18         |
|                         | KO00052    | Galactose metabolism                        | 12         |
|                         | KO00053    | Ascorbate and aldarate metabolism           | 18         |
|                         | KO00500    | Starch and sucrose metabolism               | 19         |
|                         | KO00520    | Amino sugar and nucleotide sugar metabolism | 35         |
|                         | KO00620    | Pyruvate metabolism                         | 31         |
|                         | KO00630    | Glyoxylate and dicarboxylate metabolism     | 26         |
|                         | KO00640    | Propanoate metabolism                       | 20         |
|                         | KO00650    | Butanoate metabolism                        | 13         |
|                         | KO00660    | C5-Branched dibasic acid metabolism         | 5          |
|                         | KO00562    | Inositol phosphate metabolism               | 22         |
| Energy metabolism       | KO00190    | Oxidative phosphorylation                   | 60         |
|                         | KO00195    | Photosynthesis                              | 16         |
|                         | KO00196    | Photosynthesis - antenna proteins           | 6          |
|                         | KO00710    | Carbon fixation in photosynthetic organisms | 20         |
|                         | KO00720    | Carbon fixation pathways in prokaryotes     | 16         |
|                         | KO00680    | Methane metabolism                          | 18         |
|                         | KO00910    | Nitrogen metabolism                         | 10         |
| Lipid metabolism        | KO00920    | Sulfur metabolism                           | 17         |
|                         | KO00061    | Fatty acid biosynthesis                     | 14         |
|                         | KO00062    | Fatty acid elongation                       | 8          |
|                         | KO00071    | Fatty acid degradation                      | 15         |

|                                 |         |                                                     |    |
|---------------------------------|---------|-----------------------------------------------------|----|
|                                 | KO00072 | Synthesis and degradation of ketone bodies          | 2  |
|                                 | KO00100 | Steroid biosynthesis                                | 11 |
|                                 | KO00140 | Steroid hormone biosynthesis                        | 3  |
|                                 | KO00561 | Glycerolipid metabolism                             | 21 |
|                                 | KO00564 | Glycerophospholipid metabolism                      | 25 |
|                                 | KO00565 | Ether lipid metabolism                              | 4  |
|                                 | KO00600 | Sphingolipid metabolism                             | 4  |
|                                 | KO00590 | Arachidonic acid metabolism                         | 7  |
|                                 | KO00591 | Linoleic acid metabolism                            | 2  |
|                                 | KO00592 | alpha-Linolenic acid metabolism                     | 7  |
|                                 | KO01040 | Biosynthesis of unsaturated fatty acids             | 9  |
| Nucleotide metabolism           | KO00230 | Purine metabolism                                   | 46 |
|                                 | KO00240 | Pyrimidine metabolism                               | 30 |
| Amino acid metabolism           | KO00250 | Alanine, aspartate and glutamate metabolism         | 21 |
|                                 | KO00260 | Glycine, serine and threonine metabolism            | 34 |
|                                 | KO00270 | Cysteine and methionine metabolism                  | 39 |
|                                 | KO00280 | Valine, leucine and isoleucine degradation          | 28 |
|                                 | KO00290 | Valine, leucine and isoleucine biosynthesis         | 11 |
|                                 | KO00300 | Lysine biosynthesis                                 | 10 |
|                                 | KO00310 | Lysine degradation                                  | 16 |
|                                 | KO00220 | Arginine biosynthesis                               | 19 |
|                                 | KO00330 | Arginine and proline metabolism                     | 22 |
|                                 | KO00340 | Histidine metabolism                                | 11 |
|                                 | KO00350 | Tyrosine metabolism                                 | 13 |
|                                 | KO00360 | Phenylalanine metabolism                            | 10 |
|                                 | KO00380 | Tryptophan metabolism                               | 19 |
|                                 | KO00400 | Phenylalanine, tyrosine and tryptophan biosynthesis | 21 |
| Metabolism of other amino acids | KO00410 | beta-Alanine metabolism                             | 12 |

|                                      |         |                                                                         |    |
|--------------------------------------|---------|-------------------------------------------------------------------------|----|
|                                      | KO00430 | Taurine and hypotaurine metabolism                                      | 3  |
|                                      | KO00440 | Phosphonate and phosphinate metabolism                                  | 2  |
|                                      | KO00450 | Selenocompound metabolism                                               | 14 |
|                                      | KO00460 | Cyanoamino acid metabolism                                              | 7  |
|                                      | KO00471 | D-Glutamine and D-glutamate metabolism                                  | 4  |
|                                      | KO00480 | Glutathione metabolism                                                  | 22 |
| Glycan biosynthesis and metabolism   | KO00510 | N-Glycan biosynthesis                                                   | 28 |
|                                      | KO00513 | Various types of N-glycan biosynthesis                                  | 19 |
|                                      | KO00512 | Mucin type O-glycan biosynthesis                                        | 1  |
|                                      | KO00514 | Other types of O-glycan biosynthesis                                    | 2  |
|                                      | KO00532 | Glycosaminoglycan biosynthesis - chondroitin sulfate / dermatan sulfate | 1  |
|                                      | KO00534 | Glycosaminoglycan biosynthesis - heparan sulfate / heparin              | 1  |
|                                      | KO00531 | Glycosaminoglycan degradation                                           | 1  |
|                                      | KO00563 | Glycosylphosphatidylinositol (GPI)-anchor biosynthesis                  | 14 |
|                                      | KO00603 | Glycosphingolipid biosynthesis - globo and isoglobo series              | 1  |
|                                      | KO00604 | Glycosphingolipid biosynthesis - ganglio series                         | 2  |
|                                      | KO00511 | Other glycan degradation                                                | 9  |
|                                      | KO00540 | Lipopolysaccharide biosynthesis                                         | 7  |
|                                      | KO00541 | O-Antigen nucleotide sugar biosynthesis                                 | 7  |
|                                      | KO00550 | Peptidoglycan biosynthesis                                              | 1  |
|                                      | KO00543 | Exopolysaccharide biosynthesis                                          | 1  |
| Metabolism of cofactors and vitamins | KO00730 | Thiamine metabolism                                                     | 9  |
|                                      | KO00740 | Riboflavin metabolism                                                   | 9  |
|                                      | KO00750 | Vitamin B6 metabolism                                                   | 8  |
|                                      | KO00760 | Nicotinate and nicotinamide metabolism                                  | 16 |
|                                      | KO00770 | Pantothenate and CoA biosynthesis                                       | 14 |
|                                      | KO00780 | Biotin metabolism                                                       | 8  |

|                                             |         |                                                         |    |
|---------------------------------------------|---------|---------------------------------------------------------|----|
|                                             | KO00785 | Lipoic acid metabolism                                  | 14 |
|                                             | KO00790 | Folate biosynthesis                                     | 19 |
|                                             | KO00670 | One carbon pool by folate                               | 11 |
|                                             | KO00830 | Retinol metabolism                                      | 5  |
|                                             | KO00860 | Porphyrin and chlorophyll metabolism                    | 29 |
|                                             | KO00130 | Ubiquinone and other terpenoid-quinone biosynthesis     | 16 |
| Metabolism of terpenoids and polyketides    | KO00900 | Terpenoid backbone biosynthesis                         | 27 |
|                                             | KO00902 | Monoterpenoid biosynthesis                              | 3  |
|                                             | KO00909 | Sesquiterpenoid and triterpenoid biosynthesis           | 10 |
|                                             | KO00904 | Diterpenoid biosynthesis                                | 1  |
|                                             | KO00906 | Carotenoid biosynthesis                                 | 1  |
|                                             | KO00981 | Insect hormone biosynthesis                             | 1  |
|                                             | KO00908 | Zeatin biosynthesis                                     | 2  |
|                                             | KO00903 | Limonene and pinene degradation                         | 1  |
|                                             | KO00281 | Geraniol degradation                                    | 1  |
|                                             | KO01051 | Biosynthesis of ansamycins                              | 1  |
|                                             | KO00523 | Polyketide sugar unit biosynthesis                      | 3  |
|                                             | KO01053 | Biosynthesis of siderophore group nonribosomal peptides | 1  |
| Biosynthesis of other secondary metabolites | KO00940 | Phenylpropanoid biosynthesis                            | 1  |
|                                             | KO00901 | Indole alkaloid biosynthesis                            | 1  |
|                                             | KO00950 | Isoquinoline alkaloid biosynthesis                      | 4  |
|                                             | KO00960 | Tropane, piperidine and pyridine alkaloid biosynthesis  | 6  |
|                                             | KO00232 | Caffeine metabolism                                     | 1  |
|                                             | KO00965 | Betalain biosynthesis                                   | 1  |
|                                             | KO00966 | Glucosinolate biosynthesis                              | 3  |
|                                             | KO00332 | Carbapenem biosynthesis                                 | 1  |
|                                             | KO00261 | Monobactam biosynthesis                                 | 7  |
|                                             | KO00521 | Streptomycin biosynthesis                               | 5  |

|                                           |         |                                                        |    |
|-------------------------------------------|---------|--------------------------------------------------------|----|
|                                           | KO00524 | Neomycin, kanamycin and gentamicin biosynthesis        | 1  |
|                                           | KO00401 | Novobiocin biosynthesis                                | 1  |
|                                           | KO00405 | Phenazine biosynthesis                                 | 2  |
|                                           | KO00333 | Prodigiosin biosynthesis                               | 3  |
|                                           | KO00254 | Aflatoxin biosynthesis                                 | 1  |
|                                           | KO00997 | Biosynthesis of various secondary metabolites - part 3 | 4  |
| Xenobiotics biodegradation and metabolism | KO00362 | Benzoate degradation                                   | 4  |
|                                           | KO00627 | Aminobenzoate degradation                              | 3  |
|                                           | KO00364 | Fluorobenzoate degradation                             | 1  |
|                                           | KO00625 | Chloroalkane and chloroalkene degradation              | 2  |
|                                           | KO00361 | Chlorocyclohexane and chlorobenzene degradation        | 1  |
|                                           | KO00623 | Toluene degradation                                    | 1  |
|                                           | KO00643 | Styrene degradation                                    | 5  |
|                                           | KO00791 | Atrazine degradation                                   | 1  |
|                                           | KO00930 | Caprolactam degradation                                | 2  |
|                                           | KO00626 | Naphthalene degradation                                | 1  |
|                                           | KO00980 | Metabolism of xenobiotics by cytochrome P450           | 6  |
|                                           | KO00982 | Drug metabolism - cytochrome P450                      | 5  |
|                                           | KO00983 | Drug metabolism - other enzymes                        | 17 |

---
